# Supplementary material for: Evaluation of Waste in Food Services: A Structural Equation Analysis Using Behavioral and Operational Factors
Source: MDPI journal article supplement (doi:10.3390/su15108044), 2023-05-15
Supplement: s1 [file s1]

Archive with 5 entries (5 files):
- File S1.pdf
- File S2.pdf
- File S3.pdf
- File S4.pdf
- File S5.pdf
