# Supplementary material for: Evaluation of Waste in Food Services: A Structural Equation Analysis Using Behavioral and Operational Factors
Source: MDPI journal article supplement (doi:10.3390/su15108044), 2023-05-15
Supplement: s1 [file s1 › File S1.pdf]

## File S1:

# EVALUATION OF THE DYNAMICS OF WASTE FROM THE PERSPECTIVE OF CAUSALITY ON FOOD SERVICE

## FREE AND INFORMED CONSENT

You are invited to participate as a volunteer in the survey "EVALUATION OF THE DYNAMICS OF WASTE FROM THE PERSPECTIVE OF CAUSALITY ON FOOD SERVICE," directed by Prof. Dr. Maria da Conceição Pereira da Fonseca. The research aims to verify with the users of the Food Service their perception of the underlying factors responsible for the generation of waste, observing their causal relationships and interdependence.

You will contribute to the research by completing an online questionnaire with an average duration of 10–15 minutes on aspects related to food waste and preparations at the Manoel José de Carvalho University Restaurant. Your answers will be encoded and stored in digital files, but only the researchers involved in the research, the advisors, and the statisticians will have access to them. At the end of the research, all material will be kept on file for at least five years, according to Resolution 466/12.

The direct or indirect benefits related to their collaboration in this research are of a social and environmental nature because the collective data of the study can support the management of waste and understanding of the users' perspective on food waste at the Professor Manoel José de Carvalho University Restaurant of the Federal University of Bahia. It is worth mentioning that all research has risks, and it is up to us to clarify them. The risks involved in this study are psychological, intellectual, and emotional in nature, such as the possibility of embarrassment when answering the questionnaire; discomfort; fear or insecurity; shame; stress; breach of confidentiality; and/or tiredness when answering questions.

Considering this, some initiatives will be taken in order to minimize them, such as: putting the interviewee at ease when obtaining consent to participate in the questionnaire; answering only the questions that make them feel at ease and without discomfort; allowing interruptions at any time during the questionnaire; and with regard to secrecy, the forms of guaranteeing the latter have already been described.

Once you are informed of whether or not to accept this invitation, if you agree to be part of the study, select the Yes option. If after consenting to your participation, you give up participating, you have the right and freedom to withdraw your consent at any stage of the research, either before or after data collection, regardless of the reason and without any prejudice to you. Your participation will not be remunerated and no fee will be charged. If you are unsure, contact or seek the following institutions or researchers: Here's all the contact information:

- Research Ethics Committee of the School of Nutrition or the Federal University of Bahia (CEPNUT/ENUFBA/UFBA), Rua Araújo Pinho, 32, Canela, 40.110-150, Salvador (Ba), Tel: (0xx71) 3283-7700 / Fax: (0xx71) 3283-7704.
- School of Nutrition of UFBA (ENUFBA/UFBA), located at Araújo Pinho, 32, Canela, 40.110-150, Salvador (Ba), Tel: (0xx71) 3283-7700 / Fax: (0xx71) 3283-7704.
- Responsible Researcher: Prof. Maria da Conceição Pereira da Fonseca, Contact:

---

**\*Obligatory**

1. Check one of the two options after reading the text above \*

*Mark only one.*

- ☐ I Agree with my voluntary participation in this survey
- ☐ I disagree with my voluntary participation in this survey (the questionnaire will be terminated)

2. What's your age? (Years) \*

\_\_\_\_\_

3. Which of the options below represents your family income? \*

*Mark only one.*

- ☐ Less than a minimum wage
- ☐ A minimum wage
- ☐ Up to two minimum wages
- ☐ Two or more minimum wages

4. You are a regular at the university restaurant, or have you had a meal there? \*

*Mark only one.*

- ☐ Yes
- ☐ No

5. Your relationship as a diner to the University Restaurant is: \*

*Mark only one.*

- ☐ Undergraduate Student
- ☐ Graduate Student
- ☐ Teacher
- ☐ Food Service Employee

Other:

\_\_\_\_\_

6. What's your major? \*

*Mark only one.*

- ☐ Gastronomy
- ☐ Nutrition
- ☐ Other: \_\_\_\_\_

7. How often do you eat at the University Restaurant? \*

*Mark only one.*

- ☐ 1 once a week
- ☐ 2 times a week
- ☐ 3 times a week
- ☐ 4 times a week
- ☐ 5 times a week

## Motivation

According to the scale below where: 1- Very Little; 2- Little; 3- Moderately; 4-Too and 5-Extremely, answer the questions:

8. Do Educational level directly influence the motivation associated with practicing food waste?

*Mark only one.*

| 1                     | 2                     | 3                     | 4                     | 5                     |
|-----------------------|-----------------------|-----------------------|-----------------------|-----------------------|
| <input type="radio"/> |

9. The degree of consumption awareness (avoiding eating foods that demand higher consumption of water and energy in its production, such as red meat) influences the motivation not to practice food waste?

*Mark only one.*

| 1                     | 2                     | 3                     | 4                     | 5                     |
|-----------------------|-----------------------|-----------------------|-----------------------|-----------------------|
| <input type="radio"/> |

10. Do positive attitudes influence the motivation not to practice food waste?

*Mark only one.*

| 1                     | 2                     | 3                     | 4                     | 5                     |
|-----------------------|-----------------------|-----------------------|-----------------------|-----------------------|
| <input type="radio"/> |

11. Do situational factors such as (hunger, flavor, texture, appearance, and emotional state) influence the motivation for the practice of food waste?

*Mark only one.*

| 1                     | 2                     | 3                     | 4                     | 5                     |
|-----------------------|-----------------------|-----------------------|-----------------------|-----------------------|
| <input type="radio"/> |

12. Does compliance with social norms and etiquette influence the motivation for the practice of food waste?

*Mark only one.*

| 1                     | 2                     | 3                     | 4                     | 5                     |
|-----------------------|-----------------------|-----------------------|-----------------------|-----------------------|
| <input type="radio"/> |

## Opportunity

According to the scale below where: 1- Very Little; 2- Little; 3- Moderately; 4- Very and very 5- Extremely, answer the questions:

13. Does having adequate infrastructure represent an opportunity to reduce waste in a Food and Nutrition Unit-UAN?

*Mark only one.*

| 1                     | 2                     | 3                     | 4                     | 5                     |
|-----------------------|-----------------------|-----------------------|-----------------------|-----------------------|
| <input type="radio"/> |

14. Are efficient technology and technological innovation for the production of meals considered as an opportunity to reduce waste of food during its preparation and storage?

*Mark only one.*

| 1                     | 2                     | 3                     | 4                     | 5                     |
|-----------------------|-----------------------|-----------------------|-----------------------|-----------------------|
| <input type="radio"/> |

☐ ☐ ☐ ☐ ☐

15. Do the Operational scheduling as standardization of processes, preparation of routines, and technical procedures are an opportunity to minimize food waste?

*Mark only one.*

1      2      3      4      5

☐ ☐ ☐ ☐ ☐

16. Is the provision of training for employees considered an opportunity to reduce food waste?

*Mark only one.*

1      2      3      4      5

☐ ☐ ☐ ☐ ☐

## Ability

According to the scale below where: 1- Very Little; 2- Little; 3- Moderately; 4- Very and 5- Extremely, answer the questions:

17. Does the promotion of technical knowledge through campaigns and advertisements influence the skills of the employees UAN to reduce food waste?

*Mark only one.*

1      2      3      4      5

☐ ☐ ☐ ☐ ☐

18. Is the offer of training to employees in an ANU responsible for the promotion of technical knowledge about the reduction of food waste?

*Mark only an oval.*

1      2      3      4      5

☐ ☐ ☐ ☐ ☐

# Intention

According to the scale below where: 1- Very Little; 2- Little; 3- Moderately; 4- Very and very 5- Extremely, answer the questions:

19. Although foods with low content of fats and sugars are considered healthy, are these wasted in smaller quantities?

*Mark only one.*

| 1                     | 2                     | 3                     | 4                     | 5                     |
|-----------------------|-----------------------|-----------------------|-----------------------|-----------------------|
| <input type="radio"/> |

20. Do actions committed to the environment as restricting the consumption of foods that demand higher consumption of energy and water in their preparation; searching for information about non-ecological foods; preference for the consumption of food from family farming directly influence the reduction of food waste?

*Mark only one.*

| 1                     | 2                     | 3                     | 4                     | 5                     |
|-----------------------|-----------------------|-----------------------|-----------------------|-----------------------|
| <input type="radio"/> |

21. Do environmental beliefs related to increased emissions of CO<sub>2</sub> and methane gas, deforestation of new agricultural areas, loss of biodiversity, intensive use of pesticides contribute to the reduction of food waste?

*Mark only one.*

| 1                     | 2                     | 3                     | 4                     | 5                     |
|-----------------------|-----------------------|-----------------------|-----------------------|-----------------------|
| <input type="radio"/> |

22. Local gastronomy usually establishes the edible and inedible parts and change based on region or country. Do the local gastronomy influence the intention of the practice of food waste?

*Mark only one.*

| 1                     | 2                     | 3                     | 4                     | 5                     |
|-----------------------|-----------------------|-----------------------|-----------------------|-----------------------|
| <input type="radio"/> |

23. Do intense daily routines and scarcity of time inducing rapid intake, influence the intention of the practice of food waste?

*Mark only one.*

| 1                     | 2                     | 3                     | 4                     | 5                     |
|-----------------------|-----------------------|-----------------------|-----------------------|-----------------------|
| <input type="radio"/> |

## **Waste Behavior**

According to the scale below where: 1- Very Little; 2- Little; 3- Moderately; 4- Very and very 5- Extremely, answer the questions:

24. Does overestimating what will be consumed or purchased from suppliers, understanding that it is preferable to be safe than sorry, directly contributes to food waste?

*Mark only one.*

| 1                     | 2                     | 3                     | 4                     | 5                     |
|-----------------------|-----------------------|-----------------------|-----------------------|-----------------------|
| <input type="radio"/> |

25. Does the excessive concern about contamination and ingestion of spoiled foods directly contribute to food waste?

*Mark only one.*

| 1                     | 2                     | 3                     | 4                     | 5                     |
|-----------------------|-----------------------|-----------------------|-----------------------|-----------------------|
| <input type="radio"/> |

26. Is adopting healthy habits associated with the waste of caloric foods rich in sugar and fat?

*Mark only one.*

| 1                     | 2                     | 3                     | 4                     | 5                     |
|-----------------------|-----------------------|-----------------------|-----------------------|-----------------------|
| <input type="radio"/> |

## **Waste control and management**

According to the scale below where: 1- Very Little; 2- Little; 3- Moderately; 4- Very and very 5- Extremely, answer the questions:

27. Do the equipment for heating, cooling and freezing improve the control of food

waste?

*Mark only one.*

| 1                     | 2                     | 3                     | 4                     | 5                     |
|-----------------------|-----------------------|-----------------------|-----------------------|-----------------------|
| <input type="radio"/> |

28. Do appropriate management methods and techniques for demand forecasting, inventory management, and production planning improve the control of food waste?

*Mark only one.*

| 1                     | 2                     | 3                     | 4                     | 5                     |
|-----------------------|-----------------------|-----------------------|-----------------------|-----------------------|
| <input type="radio"/> |

29. Does the recruitment of trained and qualified people to perform their work activities improve food waste control?

*Mark only one.*

| 1                     | 2                     | 3                     | 4                     | 5                     |
|-----------------------|-----------------------|-----------------------|-----------------------|-----------------------|
| <input type="radio"/> |

## Food Waste

According to the scale below where: 1- Very Little; 2- Little; 3- Moderately; 4- Very and 5- Extremely, answer the questions:

30. Are the soil impoverishment and its desertification aggravated by extensive land use and Food waste?

*Mark only one.*

| 1                     | 2                     | 3                     | 4                     | 5                     |
|-----------------------|-----------------------|-----------------------|-----------------------|-----------------------|
| <input type="radio"/> |

31. Does Food waste directly cause increased emission of methane greenhouse gases (CH<sub>4</sub>)?

*Mark only one.*

| 1 | 2 | 3 | 4 | 5 |
|---|---|---|---|---|
|---|---|---|---|---|

---

|                       |                       |                       |                       |                       |
|-----------------------|-----------------------|-----------------------|-----------------------|-----------------------|
| <input type="radio"/> |
|-----------------------|-----------------------|-----------------------|-----------------------|-----------------------|

---

32. Does Food waste negatively impact the food supply and compromise the food security of future generations?

*Mark only one.*

|   |   |   |   |   |
|---|---|---|---|---|
| 1 | 2 | 3 | 4 | 5 |
|---|---|---|---|---|

---

|                       |                       |                       |                       |                       |
|-----------------------|-----------------------|-----------------------|-----------------------|-----------------------|
| <input type="radio"/> |
|-----------------------|-----------------------|-----------------------|-----------------------|-----------------------|

---

33. Does Food waste negatively impact the consumption and supply of water, implying water shortages in many regions?

*Mark only one.*

|   |   |   |   |   |
|---|---|---|---|---|
| 1 | 2 | 3 | 4 | 5 |
|---|---|---|---|---|

---

|                       |                       |                       |                       |                       |
|-----------------------|-----------------------|-----------------------|-----------------------|-----------------------|
| <input type="radio"/> |
|-----------------------|-----------------------|-----------------------|-----------------------|-----------------------|

34. Does food waste imply an increase in the exacerbated use of pesticides and fertilizers?

*Mark only an oval.*

|   |   |   |   |   |
|---|---|---|---|---|
| 1 | 2 | 3 | 4 | 5 |
|---|---|---|---|---|

---

|                       |                       |                       |                       |                       |
|-----------------------|-----------------------|-----------------------|-----------------------|-----------------------|
| <input type="radio"/> |
|-----------------------|-----------------------|-----------------------|-----------------------|-----------------------|

---
