# Supplementary material for: Evaluation of Waste in Food Services: A Structural Equation Analysis Using Behavioral and Operational Factors
Source: MDPI journal article supplement (doi:10.3390/su15108044), 2023-05-15
Supplement: s1 [file s1 › File S3.pdf]

### File S3: Test results of the measurement model with validated.

| Construct                          | Indicator | Description                           | Load  | Alpha Cronbach's | rho_A | Composite reliability | AVE   |
|------------------------------------|-----------|---------------------------------------|-------|------------------|-------|-----------------------|-------|
| Motivation (MO)                    | (MO1)     | Educational level                     | 0,496 | 0,868            | 0,942 | 0,903                 | 0,701 |
|                                    | (MO2)     | Awareness                             | 0,765 |                  |       |                       |       |
|                                    | (MO3)     | Attitude                              | 0,713 |                  |       |                       |       |
|                                    | (MO4)     | Situational factors                   | 0,935 |                  |       |                       |       |
|                                    | (MO5)     | Social norms                          | 0,911 |                  |       |                       |       |
| Intention (IN)                     | (IN1)     | Healthy food                          | 0,620 | 0,668            | 0,603 | 0,771                 | 0,458 |
|                                    | (IN2)     | Environmental attitudes               | 0,666 |                  |       |                       |       |
|                                    | (IN3)     | Environmental beliefs                 | 0,760 |                  |       |                       |       |
|                                    | (IN4)     | Local gastronomy                      | 0,177 |                  |       |                       |       |
|                                    | (IN5)     | Scarcity of time                      | 0,653 |                  |       |                       |       |
| Waste Behavior (CD)                | (CD1)     | Habits of abundance                   | 0,796 | 0,727            | 0,728 | 0,846                 | 0,647 |
|                                    | (CD2)     | Health Risks                          | 0,834 |                  |       |                       |       |
|                                    | (CD3)     | Healthy habits                        | 0,782 |                  |       |                       |       |
| Ability (HB)                       | (HB1)     | Technical Knowledge                   | 0,741 | 0,740            | 0,768 | 0,850                 | 0,654 |
|                                    | (HB2)     | Technical skill                       | 0,838 |                  |       |                       |       |
|                                    | (OP4)     | Training                              | 0,843 |                  |       |                       |       |
| Opportunity (OP)                   | (OP1)     | Infrastructure                        | 0,841 | 0,682            | 0,688 | 0,826                 | 0,614 |
|                                    | (OP2)     | Utensils and technological innovation | 0,803 |                  |       |                       |       |
|                                    | (OP3)     | Operational scheduling                | 0,700 |                  |       |                       |       |
| Waste control and management (CGD) | CGD1      | Refrigeration and heating equipment   | 0,636 | 0,506            | 0,521 | 0,749                 | 0,501 |
|                                    | CGD2      | Methods and procedures                | 0,698 |                  |       |                       |       |
|                                    | CGD3      | People management                     | 0,781 |                  |       |                       |       |
| Food waste (DS)                    | DS1       | Extensive land use                    | 0,892 | 0,843            | 0,935 | 0,884                 | 0,608 |
|                                    | DS2       | CH4 emissions                         | 0,837 |                  |       |                       |       |
|                                    | DS3       | Food insecurity                       | 0,611 |                  |       |                       |       |
|                                    | DS4       | Extensive use of water                | 0,794 |                  |       |                       |       |
|                                    | DS5       | Extensive use pesticides              | 0,735 |                  |       |                       |       |

Note: The indicator OP4 was permuted for the Ability construct according to [1].

### Reference

- 1 Joseph, F.; Hair, J.; Hult, G.T.M.; Ringle, C.M.; Sarstedt, M. *A Primer on Partial Least Squares Structural Equation Modeling (PLS-SEM)*; SAGE: Los Angeles, CA, USA, 2017.
