# Supplementary material for: Evaluation of Waste in Food Services: A Structural Equation Analysis Using Behavioral and Operational Factors
Source: MDPI journal article supplement (doi:10.3390/su15108044), 2023-05-15
Supplement: s1 [file s1 › File S4.pdf]

**Table S3** – Comparison of the assertions of the Motivation variable

| Construct  | Item                | Content of submitted assertions for content validity and pre-testing                                                                                                                                                                                                                                                          | Definition of assertions after validity of content and pre-test                                                               |
|------------|---------------------|-------------------------------------------------------------------------------------------------------------------------------------------------------------------------------------------------------------------------------------------------------------------------------------------------------------------------------|-------------------------------------------------------------------------------------------------------------------------------|
| Motivation | Educational level   | diners' educational level influences directly the motivation not to practice food waste... How much do educational level influence my motivation not to waste food?                                                                                                                                                           | Do educational level directly influence the motivation associated with practicing food waste?                                 |
|            | Awareness           | The degree of consumption awareness (dosing the amount of food that you will eat, avoiding eating foods that demand higher consumption of water and energy in their production, such as red meat) influences the motivation not to practice food waste... How conscious am I about not wasting food?                          | The degree of consumption awareness influences the motivation not to practice food waste?                                     |
|            | Attitude            | Positive attitudes (interacting with employees who are served, going to the restaurant only when you are hungry etc.) influence the motivation not to practice food waste... How proactive do I feel about taking targeted actions to reduce waste?                                                                           | Do positive attitudes influence the motivation not to practice food waste?                                                    |
|            | Situational factors | Situational factors such as (hunger, flavor, texture, appearance, emotional state etc.) influence the motivation for the practice of waste... How do situational factors motivate me not to waste food?                                                                                                                       | Do situational factors such as (hunger, flavor, texture, appearance) influence the motivation for the practice of food waste? |
|            | Social norms        | Social and behavioral norms influence (putting into practice proverbs such as: It's better to be safe than sorry., to have a quick lunch and not eat the meal completely without plausible justification, etc.) in the motivation for the practice of waste... How do social and conduct norms motivate me not to waste food? | Does compliance with social norms and etiquette influence the motivation for the practice of food waste?                      |

**Table S4 - Content Validity – Motivation**

| Item         |                                                                                                                                                                                                                                                       | Assertive                                                                                                                                                                                                                                               | Sentence wording suggestion                                                                                                   | Indicator importance level |               |               |   |   |
|--------------|-------------------------------------------------------------------------------------------------------------------------------------------------------------------------------------------------------------------------------------------------------|---------------------------------------------------------------------------------------------------------------------------------------------------------------------------------------------------------------------------------------------------------|-------------------------------------------------------------------------------------------------------------------------------|----------------------------|---------------|---------------|---|---|
| Motivation   | Sociodemographic                                                                                                                                                                                                                                      | Sociodemographic factors (such as: income, educational education, gender, etc.) directly influence the motivation not to practice food waste... How much do sociodemographic factors influence my motivation not to waste food?                         | Do sociodemographic factors directly influence the motivation associated with practicing food waste?                          | Dispensable                |               | Indispensable |   |   |
|              |                                                                                                                                                                                                                                                       |                                                                                                                                                                                                                                                         |                                                                                                                               | 1                          | 2             | 3             | 4 | 5 |
|              |                                                                                                                                                                                                                                                       |                                                                                                                                                                                                                                                         |                                                                                                                               | X                          |               |               |   |   |
|              | Awareness                                                                                                                                                                                                                                             | The degree of consumption awareness (avoiding eating foods that demand higher consumption of water and energy in their production, such as red meat) influences the motivation not to practice food waste... How conscious am I about not wasting food? | The degree of consumption awareness influences the motivation not to practice food waste?                                     | Dispensable                |               | Indispensable |   |   |
|              |                                                                                                                                                                                                                                                       |                                                                                                                                                                                                                                                         |                                                                                                                               | 1                          | 2             | 3             | 4 | 5 |
|              |                                                                                                                                                                                                                                                       |                                                                                                                                                                                                                                                         |                                                                                                                               |                            |               |               | X |   |
|              | Attitude                                                                                                                                                                                                                                              | Positive attitudes (going to the restaurant only when you are hungry etc.) influence the motivation not to practice food waste... How proactive do I feel about taking targeted actions to reduce waste?                                                | Do positive attitudes influence the motivation not to practice food waste?                                                    | Dispensable                |               | Indispensable |   |   |
|              |                                                                                                                                                                                                                                                       |                                                                                                                                                                                                                                                         |                                                                                                                               | 1                          | 2             | 3             | 4 | 5 |
|              |                                                                                                                                                                                                                                                       |                                                                                                                                                                                                                                                         |                                                                                                                               |                            |               |               |   | X |
|              | Situational factors                                                                                                                                                                                                                                   | Situational factors such as (hunger, flavor, texture, appearance, emotional state etc.) influence the motivation for the practice of waste... How do situational factors motivate me not to waste food?                                                 | Do situational factors such as (hunger, flavor, texture, appearance) influence the motivation for the practice of food waste? | Dispensable                |               | Indispensable |   |   |
| 1            |                                                                                                                                                                                                                                                       |                                                                                                                                                                                                                                                         |                                                                                                                               | 2                          | 3             | 4             | 5 |   |
|              |                                                                                                                                                                                                                                                       |                                                                                                                                                                                                                                                         |                                                                                                                               |                            |               |               | X |   |
| Social norms | Social and behavioral norms influence (It's better to be safe than sorry., to have a quick lunch without plausible justification, etc.) in the motivation for the practice of waste... How do social and conduct norms motivate me not to waste food? | Does compliance with social norms and etiquette influence the motivation for the practice of food waste?                                                                                                                                                | Dispensable                                                                                                                   |                            | Indispensable |               |   |   |
|              |                                                                                                                                                                                                                                                       |                                                                                                                                                                                                                                                         | 1                                                                                                                             | 2                          | 3             | 4             | 5 |   |
|              |                                                                                                                                                                                                                                                       |                                                                                                                                                                                                                                                         |                                                                                                                               |                            |               | X             |   |   |

**Table S5 - Content Validity (Fragment) – Motivation**

|            |                                                                                                                        |                                                                                                                                                                                                                              |
|------------|------------------------------------------------------------------------------------------------------------------------|------------------------------------------------------------------------------------------------------------------------------------------------------------------------------------------------------------------------------|
| Motivation | 1. Is the latent variable relevant to the analysis of Motivation in the practice of food waste?                        | <div> <div>Strongly Disagree</div> <div> <div>1</div> <div>2</div> <div>3</div> <div>4</div> <div>5</div> </div> <div> <div></div> <div></div> <div></div> <div></div> <div>X</div> </div> <div>I totally agree</div> </div> |
|            | 2. Are the defined indicators consistent and sufficient to jointly measure the Motivation construct?                   | <div> <div>Strongly Disagree</div> <div> <div>1</div> <div>2</div> <div>3</div> <div>4</div> <div>5</div> </div> <div> <div></div> <div></div> <div></div> <div></div> <div>X</div> </div> <div>I totally agree</div> </div> |
|            | 3. The wording of the statements is precise, and makes clear the relevance of the indicators to their latent variable? | <div> <div>Strongly Disagree</div> <div> <div>1</div> <div>2</div> <div>3</div> <div>4</div> <div>5</div> </div> <div> <div></div> <div></div> <div></div> <div>X</div> <div></div> </div> <div>I totally agree</div> </div> |
|            | The space below is reserved for expert comments.                                                                       |                                                                                                                                                                                                                              |

**Table S6 – Comparison of the assertions of the Intention variable**

| Construct | Item                    | Content of submitted assertions for content validity and pre-testing                                                                                                                                                                                                                                                                                                                                                                    | Definition of assertions after validity of content and pre-test                                                                                                                                                                                                                                                           |
|-----------|-------------------------|-----------------------------------------------------------------------------------------------------------------------------------------------------------------------------------------------------------------------------------------------------------------------------------------------------------------------------------------------------------------------------------------------------------------------------------------|---------------------------------------------------------------------------------------------------------------------------------------------------------------------------------------------------------------------------------------------------------------------------------------------------------------------------|
| Intention | Healthy diet            | Food (with low content of fats, sugars and sodium) is placed in dishes / trays because they are considered healthy, but that are not the preference of diners, causing their waste ... How can the adoption of healthy eating reflect on my intention to waste food?                                                                                                                                                                    | Although foods with low content of fats, sugars, and sodium are considered healthy, are these wasted in smaller quantities?                                                                                                                                                                                               |
|           | Healthy food            | Food (with low content of fats, sugars and sodium) is placed in dishes / trays because they are considered healthy, but that are not the preference of diners, causing their waste ... How can the adoption of healthy eating reflect on my intention to waste food?                                                                                                                                                                    | Although foods with low content of fats, sugars, and sodium are considered healthy, are these wasted in smaller quantities?                                                                                                                                                                                               |
|           | Environmental attitudes | Actions committed to the environment (restricting the consumption of foods that demand higher consumption of energy and water in its preparation; searching for information about non-ecological foods; preference for the consumption of food from family farming) directly influence the intention of the practice of food waste... How does the adoption of environmentally friendly actions reflect on my intention to avoid waste? | Do actions committed to the environment as restricting the consumption of foods that demand higher consumption of energy and water in their preparation; searching for information about non-ecological foods; preference for the consumption of food from family farming directly influence the reduction of food waste? |
|           | Environmental beliefs   | Environmental beliefs (existence of direct relationships between waste of food with environmental problems such as: increased emissions of CO2 and methane gas, deforestation of new agricultural areas, loss of biodiversity, intensive use of pesticides, etc.) influence the intention of the practice of food waste... How do environmental beliefs and values influence me not to waste food?                                      | Do environmental beliefs related to increased emissions of CO2 and methane gas, deforestation of new agricultural areas, loss of biodiversity, intensive use of pesticides contribute to the reduction of food waste?                                                                                                     |
|           | Cultural factors        | Cultural factors that concern local gastronomy, usually establish what are edible and inedible parts, changing by region or country... How do cultural factors reflect on my intention to avoid food waste?                                                                                                                                                                                                                             | Cultural factors that concern local gastronomy usually establish the edible and inedible parts and change based on region or country. Do these cultural factors influence the intention of the practice of food waste?                                                                                                    |
|           | Scarcity of time        | Scarcity of time inducing rapid intake or intense daily routine, influence the intention of the practice of food waste... How much does the scarcity of time influence my intention to waste food?                                                                                                                                                                                                                                      | Do intense daily routines and scarcity of time inducing rapid intake, influence the intention of the practice of food waste?                                                                                                                                                                                              |

**Table S7 - Content Validity – Intention**

| Item      |                         | Assertive                                                                                                                                                                                                                                                                                                                                                                                                                               | Sentence wording suggestion                                                                                                                                                                                                                                                                                               | Indicator importance level |   |               |   |   |
|-----------|-------------------------|-----------------------------------------------------------------------------------------------------------------------------------------------------------------------------------------------------------------------------------------------------------------------------------------------------------------------------------------------------------------------------------------------------------------------------------------|---------------------------------------------------------------------------------------------------------------------------------------------------------------------------------------------------------------------------------------------------------------------------------------------------------------------------|----------------------------|---|---------------|---|---|
| Intention | Healthy diet            | Food (with low content of fats, sugars and sodium) is placed in dishes / trays because they are considered healthy, but that are not the preference of diners, causing their waste ... How can the adoption of healthy eating reflect on my intention to waste food?                                                                                                                                                                    | Although foods with low content of fats, sugars, and sodium are considered healthy, are these wasted in smaller quantities?                                                                                                                                                                                               | Dispensable                |   | Indispensable |   |   |
|           |                         |                                                                                                                                                                                                                                                                                                                                                                                                                                         |                                                                                                                                                                                                                                                                                                                           | 1                          | 2 | 3             | 4 | 5 |
|           |                         |                                                                                                                                                                                                                                                                                                                                                                                                                                         |                                                                                                                                                                                                                                                                                                                           |                            |   |               | X |   |
|           | Environmental attitudes | Actions committed to the environment (restricting the consumption of foods that demand higher consumption of energy and water in its preparation; searching for information about non-ecological foods; preference for the consumption of food from family farming) directly influence the intention of the practice of food waste... How does the adoption of environmentally friendly actions reflect on my intention to avoid waste? | Do actions committed to the environment as restricting the consumption of foods that demand higher consumption of energy and water in their preparation; searching for information about non-ecological foods; preference for the consumption of food from family farming directly influence the reduction of food waste? | Dispensable                |   | Indispensable |   |   |
|           |                         |                                                                                                                                                                                                                                                                                                                                                                                                                                         |                                                                                                                                                                                                                                                                                                                           | 1                          | 2 | 3             | 4 | 5 |
|           |                         |                                                                                                                                                                                                                                                                                                                                                                                                                                         |                                                                                                                                                                                                                                                                                                                           |                            |   |               |   | X |
|           | Environmental beliefs   | Environmental beliefs (existence of direct relationships between waste of food with environmental problems such as: increased emissions of CO2 and methane gas, deforestation of new agricultural areas, loss of biodiversity, intensive use of pesticides, etc.) influence the intention of the practice of food waste... How do environmental beliefs and values influence me not to waste food?                                      | Do environmental beliefs related to increased emissions of CO2 and methane gas, deforestation of new agricultural areas, loss of biodiversity, intensive use of pesticides contribute to the reduction of food waste?                                                                                                     | Dispensable                |   | Indispensable |   |   |
|           |                         |                                                                                                                                                                                                                                                                                                                                                                                                                                         |                                                                                                                                                                                                                                                                                                                           | 1                          | 2 | 3             | 4 | 5 |
|           |                         |                                                                                                                                                                                                                                                                                                                                                                                                                                         |                                                                                                                                                                                                                                                                                                                           |                            |   |               | X |   |
|           | Cultural factor         | Cultural factors that concern local gastronomy, usually establish what are edible and inedible parts, changing by region or country... How do cultural factors reflect on my intention to avoid food waste?                                                                                                                                                                                                                             | Cultural factors that concern local gastronomy usually establish the edible and inedible parts and change based on region or country. Do these cultural factors influence the intention of the practice of food waste?                                                                                                    | Dispensable                |   | Indispensable |   |   |
|           |                         |                                                                                                                                                                                                                                                                                                                                                                                                                                         |                                                                                                                                                                                                                                                                                                                           | 1                          | 2 | 3             | 4 | 5 |
|           |                         |                                                                                                                                                                                                                                                                                                                                                                                                                                         |                                                                                                                                                                                                                                                                                                                           |                            |   |               | X |   |
|           | Scarcity of time        | Scarcity of time inducing rapid intake or intense daily routine, influence the intention of the practice of food waste... How much does the scarcity of time influence my intention to waste food?                                                                                                                                                                                                                                      | Do intense daily routines and scarcity of time inducing rapid intake, influence the intention of the practice of food waste?                                                                                                                                                                                              | Dispensable                |   | Indispensable |   |   |
|           |                         |                                                                                                                                                                                                                                                                                                                                                                                                                                         |                                                                                                                                                                                                                                                                                                                           | 1                          | 2 | 3             | 4 | 5 |
|           |                         |                                                                                                                                                                                                                                                                                                                                                                                                                                         |                                                                                                                                                                                                                                                                                                                           |                            |   |               |   | X |
|           | Sense of guilt          | The feeling of guilt is considered as a preponderant factor in the practice of waste. How do feeling of guilt reflect on my intention to avoid food waste?                                                                                                                                                                                                                                                                              | Can the feelings of guilt be considered a factor that helps reduce waste?                                                                                                                                                                                                                                                 | Dispensable                |   | Indispensable |   |   |
|           |                         |                                                                                                                                                                                                                                                                                                                                                                                                                                         |                                                                                                                                                                                                                                                                                                                           | 1                          | 2 | 3             | 4 | 5 |
|           |                         |                                                                                                                                                                                                                                                                                                                                                                                                                                         |                                                                                                                                                                                                                                                                                                                           | X                          |   |               |   |   |

**Table S8 - Content Validity – Intention**

|                                                                                                                                                                                                                                                                                                                                                                                                                                                                                                                                                                                                                                                                                                                                                                                                   |                                                                                                                                                                                                                                                                                                                                                                                                                                                                                                                                                                                                                                                                                                                                                                                                   |
|---------------------------------------------------------------------------------------------------------------------------------------------------------------------------------------------------------------------------------------------------------------------------------------------------------------------------------------------------------------------------------------------------------------------------------------------------------------------------------------------------------------------------------------------------------------------------------------------------------------------------------------------------------------------------------------------------------------------------------------------------------------------------------------------------|---------------------------------------------------------------------------------------------------------------------------------------------------------------------------------------------------------------------------------------------------------------------------------------------------------------------------------------------------------------------------------------------------------------------------------------------------------------------------------------------------------------------------------------------------------------------------------------------------------------------------------------------------------------------------------------------------------------------------------------------------------------------------------------------------|
| <b>Intention</b>                                                                                                                                                                                                                                                                                                                                                                                                                                                                                                                                                                                                                                                                                                                                                                                  | 1. Is the latent variable relevant to the analysis of Intention in the practice of food waste?                                                                                                                                                                                                                                                                                                                                                                                                                                                                                                                                                                                                                                                                                                    |
|                                                                                                                                                                                                                                                                                                                                                                                                                                                                                                                                                                                                                                                                                                                                                                                                   | <div style="display: flex; justify-content: space-around; margin-bottom: 5px;"> <span>1</span><span>2</span><span>3</span><span>4</span><span>5</span> </div> <div style="display: flex; justify-content: space-around; align-items: center;"> <div style="border: 1px solid black; width: 40px; height: 20px;"></div> <div style="border: 1px solid black; width: 40px; height: 20px;"></div> <div style="border: 1px solid black; width: 40px; height: 20px;"></div> <div style="border: 1px solid black; width: 40px; height: 20px;"></div> <div style="border: 1px solid black; width: 40px; height: 20px; text-align: center;">X</div> </div> <div style="display: flex; justify-content: space-between; margin-top: 5px;"> <span>Totally disagree</span><span>I totally agree</span> </div> |
|                                                                                                                                                                                                                                                                                                                                                                                                                                                                                                                                                                                                                                                                                                                                                                                                   | 2. Are the defined indicators consistent and sufficient to jointly measure the Intention construct?                                                                                                                                                                                                                                                                                                                                                                                                                                                                                                                                                                                                                                                                                               |
|                                                                                                                                                                                                                                                                                                                                                                                                                                                                                                                                                                                                                                                                                                                                                                                                   | <div style="display: flex; justify-content: space-around; margin-bottom: 5px;"> <span>1</span><span>2</span><span>3</span><span>4</span><span>5</span> </div> <div style="display: flex; justify-content: space-around; align-items: center;"> <div style="border: 1px solid black; width: 40px; height: 20px;"></div> <div style="border: 1px solid black; width: 40px; height: 20px;"></div> <div style="border: 1px solid black; width: 40px; height: 20px;"></div> <div style="border: 1px solid black; width: 40px; height: 20px;"></div> <div style="border: 1px solid black; width: 40px; height: 20px; text-align: center;">X</div> </div> <div style="display: flex; justify-content: space-between; margin-top: 5px;"> <span>Totally disagree</span><span>I totally agree</span> </div> |
| 3. The wording of the statements is precise, and makes clear the relevance of the indicators to their latent variable?                                                                                                                                                                                                                                                                                                                                                                                                                                                                                                                                                                                                                                                                            |                                                                                                                                                                                                                                                                                                                                                                                                                                                                                                                                                                                                                                                                                                                                                                                                   |
| <div style="display: flex; justify-content: space-around; margin-bottom: 5px;"> <span>1</span><span>2</span><span>3</span><span>4</span><span>5</span> </div> <div style="display: flex; justify-content: space-around; align-items: center;"> <div style="border: 1px solid black; width: 40px; height: 20px;"></div> <div style="border: 1px solid black; width: 40px; height: 20px;"></div> <div style="border: 1px solid black; width: 40px; height: 20px;"></div> <div style="border: 1px solid black; width: 40px; height: 20px;"></div> <div style="border: 1px solid black; width: 40px; height: 20px; text-align: center;">X</div> </div> <div style="display: flex; justify-content: space-between; margin-top: 5px;"> <span>Totally disagree</span><span>I totally agree</span> </div> |                                                                                                                                                                                                                                                                                                                                                                                                                                                                                                                                                                                                                                                                                                                                                                                                   |
| The space below is reserved for expert comments.                                                                                                                                                                                                                                                                                                                                                                                                                                                                                                                                                                                                                                                                                                                                                  |                                                                                                                                                                                                                                                                                                                                                                                                                                                                                                                                                                                                                                                                                                                                                                                                   |

**Table S9 – Comparison of the assertions of the Waste Behavior variable**

| Construct      | Item                | Content of submitted assertions for content validity and pre-testing                                                                                                                                                                                   | Definition of assertions after validity of content and pre-test                                                                                                       |
|----------------|---------------------|--------------------------------------------------------------------------------------------------------------------------------------------------------------------------------------------------------------------------------------------------------|-----------------------------------------------------------------------------------------------------------------------------------------------------------------------|
| Waste Behavior | Habits of abundance | Overestimating what will be consumed or purchased from suppliers, understanding that it is preferable to be safe than sorry, directly contributes to food waste... How much does the adoption of this type of behavior reflect in my actions of waste? | Does overestimating what will be consumed or purchased from suppliers, understanding that it is preferable to be safe than sorry, directly contributes to food waste? |
|                | Health risks        | Excessive concern about contamination and ingestion of spoiled foods is sometimes responsible for food waste... How much does this kind of concern affect my behavior inducing me to waste food?                                                       | Does the excessive concern about contamination and ingestion of spoiled foods directly contribute to food waste?                                                      |
|                | Healthy habits      | Adopting healthy habits (physical activity, eating healthier foods, etc.) is sometimes associated with the waste of caloric foods... How much does this type of behavior lead me to waste?                                                             | Is adopting healthy habits associated with the waste of caloric foods rich in sugar and fat?                                                                          |
|                | Religious beliefs   | Adopting Religious beliefs is sometimes associated with waste of some types of food... How much does this type of behavior lead me to waste?                                                                                                           | Is religious beliefs responsible for food waste?                                                                                                                      |

|  |                |                                                                                                                                                              |                                                                                    |
|--|----------------|--------------------------------------------------------------------------------------------------------------------------------------------------------------|------------------------------------------------------------------------------------|
|  | Binge Eating   | Binge eating is seen as a contributing factor to food waste...How much does this type of behavior lead me to waste?                                          | Is binge eating responsible for food waste in food service??                       |
|  | Very demanding | Very demanding people end up wasting more food, because they are not always satisfied with the menu... How much does this type of behavior lead me to waste? | Do people who are very demanding waste food because they are not always satisfied? |

**Table S10 - Content Validity – Waste Behavior**

| Item           |                     | Assertive                                                                                                                                                                                                                                              | Sentence wording suggestion                                                                                                                                           | Indicator importance level          |                                     |                          |                                     |                                     |
|----------------|---------------------|--------------------------------------------------------------------------------------------------------------------------------------------------------------------------------------------------------------------------------------------------------|-----------------------------------------------------------------------------------------------------------------------------------------------------------------------|-------------------------------------|-------------------------------------|--------------------------|-------------------------------------|-------------------------------------|
| Waste Behavior | Habits of abundance | Overestimating what will be consumed or purchased from suppliers, understanding that it is preferable to be safe than sorry, directly contributes to food waste... How much does the adoption of this type of behavior reflect in my actions of waste? | Does overestimating what will be consumed or purchased from suppliers, understanding that it is preferable to be safe than sorry, directly contributes to food waste? | Dispensable                         | Indispensable                       |                          |                                     |                                     |
|                |                     |                                                                                                                                                                                                                                                        |                                                                                                                                                                       | 1                                   | 2                                   | 3                        | 4                                   | 5                                   |
|                |                     |                                                                                                                                                                                                                                                        |                                                                                                                                                                       | <input type="checkbox"/>            | <input type="checkbox"/>            | <input type="checkbox"/> | <input checked="" type="checkbox"/> | <input type="checkbox"/>            |
|                | Health risks        | Excessive concern about contamination and ingestion of spoiled foods is sometimes responsible for food waste... How much does this kind of concern affect my behavior inducing me to waste food?                                                       | Does the excessive concern about contamination and ingestion of spoiled foods directly contribute to food waste?                                                      | Dispensable                         | Indispensable                       |                          |                                     |                                     |
|                |                     |                                                                                                                                                                                                                                                        |                                                                                                                                                                       | 1                                   | 2                                   | 3                        | 4                                   | 5                                   |
|                |                     |                                                                                                                                                                                                                                                        |                                                                                                                                                                       | <input type="checkbox"/>            | <input type="checkbox"/>            | <input type="checkbox"/> | <input type="checkbox"/>            | <input checked="" type="checkbox"/> |
|                | Healthy habits      | Adopting healthy habits (physical activity, eating healthier foods, etc.) is sometimes associated with the waste of caloric foods... How much does this type of behavior lead me to waste?                                                             | Is adopting healthy habits associated with the waste of caloric foods rich in sugar and fat?                                                                          | Dispensable                         | Indispensable                       |                          |                                     |                                     |
|                |                     |                                                                                                                                                                                                                                                        |                                                                                                                                                                       | 1                                   | 2                                   | 3                        | 4                                   | 5                                   |
|                |                     |                                                                                                                                                                                                                                                        |                                                                                                                                                                       | <input type="checkbox"/>            | <input type="checkbox"/>            | <input type="checkbox"/> | <input type="checkbox"/>            | <input checked="" type="checkbox"/> |
|                | Religious beliefs   | Adopting Religious beliefs is sometimes associated with waste of some types of food... How much does this type of behavior lead me to waste?                                                                                                           | Is religious beliefs responsible for food waste?                                                                                                                      | Dispensable                         | Indispensable                       |                          |                                     |                                     |
|                |                     |                                                                                                                                                                                                                                                        |                                                                                                                                                                       | 1                                   | 2                                   | 3                        | 4                                   | 5                                   |
|                |                     |                                                                                                                                                                                                                                                        |                                                                                                                                                                       | <input type="checkbox"/>            | <input checked="" type="checkbox"/> | <input type="checkbox"/> | <input type="checkbox"/>            | <input type="checkbox"/>            |
|                | Binge Eating        | Binge eating is seen as a contributing factor to food waste...How much does this type of behavior lead me to waste?                                                                                                                                    | Is binge eating responsible for food waste in food service??                                                                                                          | Dispensable                         | Indispensable                       |                          |                                     |                                     |
|                |                     |                                                                                                                                                                                                                                                        |                                                                                                                                                                       | 1                                   | 2                                   | 3                        | 4                                   | 5                                   |
|                |                     |                                                                                                                                                                                                                                                        |                                                                                                                                                                       | <input checked="" type="checkbox"/> | <input type="checkbox"/>            | <input type="checkbox"/> | <input type="checkbox"/>            | <input type="checkbox"/>            |
|                | Very demanding      | Very demanding people end up wasting more food, because they are not always satisfied with the menu... How much does this type of behavior lead me to waste?                                                                                           | Do people who are very demanding waste food because they are not always satisfied?                                                                                    | Dispensable                         | Indispensable                       |                          |                                     |                                     |
|                |                     |                                                                                                                                                                                                                                                        |                                                                                                                                                                       | 1                                   | 2                                   | 3                        | 4                                   | 5                                   |
|                |                     |                                                                                                                                                                                                                                                        |                                                                                                                                                                       | <input checked="" type="checkbox"/> | <input type="checkbox"/>            | <input type="checkbox"/> | <input type="checkbox"/>            | <input type="checkbox"/>            |

**Table S11 - Content Validity – Waste Behavior**

|                       |                                                                                                                        |                          |                          |                          |                          |                                     |                 |
|-----------------------|------------------------------------------------------------------------------------------------------------------------|--------------------------|--------------------------|--------------------------|--------------------------|-------------------------------------|-----------------|
| <b>Waste Behavior</b> | 1. Is the latent variable relevant to the analysis of Waste Behavior in the practice of food waste?                    |                          |                          |                          |                          |                                     |                 |
|                       | Totally disagree                                                                                                       | 1                        | 2                        | 3                        | 4                        | 5                                   | I totally agree |
|                       |                                                                                                                        | <input type="checkbox"/> | <input type="checkbox"/> | <input type="checkbox"/> | <input type="checkbox"/> | <input checked="" type="checkbox"/> |                 |
|                       |                                                                                                                        |                          |                          |                          |                          |                                     |                 |
|                       | 2. Are the defined indicators consistent and sufficient to jointly measure the Waste Behavior construct?               |                          |                          |                          |                          |                                     |                 |
|                       | Totally disagree                                                                                                       | 1                        | 2                        | 3                        | 4                        | 5                                   | I totally agree |
|                       |                                                                                                                        | <input type="checkbox"/> | <input type="checkbox"/> | <input type="checkbox"/> | <input type="checkbox"/> | <input checked="" type="checkbox"/> |                 |
|                       |                                                                                                                        |                          |                          |                          |                          |                                     |                 |
|                       | 3. The wording of the statements is precise, and makes clear the relevance of the indicators to their latent variable? |                          |                          |                          |                          |                                     |                 |
|                       | Totally disagree                                                                                                       | 1                        | 2                        | 3                        | 4                        | 5                                   | I totally agree |
|                       |                                                                                                                        | <input type="checkbox"/> | <input type="checkbox"/> | <input type="checkbox"/> | <input type="checkbox"/> | <input checked="" type="checkbox"/> |                 |
|                       |                                                                                                                        |                          |                          |                          |                          |                                     |                 |
|                       | The space below is reserved for expert comments.                                                                       |                          |                          |                          |                          |                                     |                 |

**Table S12 – Comparison of the assertions of the Ability variable**

| Construct | Item            | Content of submitted assertions for content validity and pre-testing                                                                                                                                                                                                                 | Definition of assertions after validity of content and pre-test                                                                         |
|-----------|-----------------|--------------------------------------------------------------------------------------------------------------------------------------------------------------------------------------------------------------------------------------------------------------------------------------|-----------------------------------------------------------------------------------------------------------------------------------------|
| Ability   | Knowledge       | The promotion of knowledge through campaigns, advertisements and training (on cutting and preparation techniques, among others) influence the skills of employees (food handlers) to reduce waste... How can promoting knowledge influence employees' skills in managing food waste? | Does the promotion of knowledge through campaigns and advertisements influence the skills of the employees UAN to reduce food waste?    |
|           | Technical skill | The offer of training to employees (food handlers) in FNU is responsible for the promotion of knowledge about the reduction of food waste... How does the training of handlers influence their knowledge of food waste                                                               | Is the offer of training to employees in an ANU responsible for the promotion of technical knowledge about the reduction of food waste? |

**Table S13 - Content Validity – Ability**

| Item    |                 | Assertive                                                                                                                                                                                                                                              | Sentence wording suggestion                                                                                                                                          | Indicator importance level |                      |                      |                      |               |
|---------|-----------------|--------------------------------------------------------------------------------------------------------------------------------------------------------------------------------------------------------------------------------------------------------|----------------------------------------------------------------------------------------------------------------------------------------------------------------------|----------------------------|----------------------|----------------------|----------------------|---------------|
| Ability | Knowledge       | Overestimating what will be consumed or purchased from suppliers, understanding that it is preferable to be safe than sorry, directly contributes to food waste... How much does the adoption of this type of behavior reflect in my actions of waste? | Does overestimating what will be consumed or purchased from suppliers, understanding that it is preferable to be safe than sorry, directly contribute to food waste? | Dispensable                |                      |                      |                      | Indispensable |
|         |                 |                                                                                                                                                                                                                                                        |                                                                                                                                                                      | 1                          | 2                    | 3                    | 4                    | 5             |
|         |                 |                                                                                                                                                                                                                                                        |                                                                                                                                                                      | <input type="text"/>       | <input type="text"/> | <input type="text"/> | <input type="text"/> | X             |
|         | Technical skill | Excessive concern about contamination and ingestion of spoiled foods is sometimes responsible for food waste... How much does this kind of concern affect my behavior inducing me to waste food?                                                       | Does the excessive concern about contamination and ingestion of spoiled foods directly contribute to food waste?                                                     | Dispensable                |                      |                      |                      | Indispensable |
|         |                 |                                                                                                                                                                                                                                                        |                                                                                                                                                                      | 1                          | 2                    | 3                    | 4                    | 5             |
|         |                 |                                                                                                                                                                                                                                                        |                                                                                                                                                                      | <input type="text"/>       | <input type="text"/> | <input type="text"/> | <input type="text"/> | X             |

**Table S14 - Content Validity – Ability**

| Table 3.1: Content validity: Ability |                                                                                                                                                                                                                                                                                                                                                                      | X |
|--------------------------------------|----------------------------------------------------------------------------------------------------------------------------------------------------------------------------------------------------------------------------------------------------------------------------------------------------------------------------------------------------------------------|---|
| Ability                              | <p>1. Is the latent variable relevant to the analysis of Ability in the practice of food waste?</p> <p>Totally disagree      1      2      3      4      5      I totally agree</p> <p><input type="checkbox"/>   <input type="checkbox"/>   <input type="checkbox"/>   <input type="checkbox"/>   <input checked="" type="checkbox"/></p>                           |   |
|                                      | <p>2. Are the defined indicators consistent and sufficient to jointly measure the Ability construct?</p> <p>Totally disagree      1      2      3      4      5      I totally agree</p> <p><input type="checkbox"/>   <input type="checkbox"/>   <input type="checkbox"/>   <input checked="" type="checkbox"/>   <input type="checkbox"/></p>                      |   |
|                                      | <p>3. The wording of the statements is precise, and makes clear the relevance of the indicators to their latent variable?</p> <p>Totally disagree      1      2      3      4      5      I totally agree</p> <p><input type="checkbox"/>   <input type="checkbox"/>   <input type="checkbox"/>   <input type="checkbox"/>   <input checked="" type="checkbox"/></p> |   |
|                                      | The space below is reserved for expert comments.                                                                                                                                                                                                                                                                                                                     |   |

**Table S15 – Comparison of the assertions of the Opportunity variable**

| Construct   | Item                                  | Content of submitted assertions for content validity and pre-testing                                                                                                                                                                                                                                                                                                                                                               | Definition of assertions after validity of content and pre-test                                                                                                            |
|-------------|---------------------------------------|------------------------------------------------------------------------------------------------------------------------------------------------------------------------------------------------------------------------------------------------------------------------------------------------------------------------------------------------------------------------------------------------------------------------------------|----------------------------------------------------------------------------------------------------------------------------------------------------------------------------|
| Opportunity | Infrastructure                        | Having adequate infrastructure (machinery, heating equipment, utensils, lay-out, among others) represents an opportunity to reduce waste... How the presence of adequate in-frastructure in a Food and Nutrition Unit-FNU (restaurant, industrial kitchen and cafete-ria) represents an opportunity for decreasing food waste?                                                                                                     | Does having adequate infrastructure represent an opportunity to reduce waste in a Food and Nutrition Unit-UAN?                                                             |
|             | Utensils and technological innovation | Refrigeration equipment, machinery and utensils with efficient * technology (or tech-nological innovation) for the production of meals is considered as an opportunity to reduce waste of food during its preparation and storage... In your opinion, how does the use of the technologies mentioned allow employees of an FNU (restaurant, industrial kitchen and cafeteria) to reduce food waste during preparation and storage? | Are efficient technology and technological innovation for the production of meals considered as an opportunity to reduce waste of food during its preparation and storage? |
|             | Standardization of processes          | The standardization of processes, preparation of routines and technical procedures represent an opportunity to minimize waste... In your opinion, how the standardization of processes, preparation of routines and appropriate technical procedures in an FNUs can be considered an opportunity to avoid waste?                                                                                                                   | Do the standardization of processes, preparation of routines, and technical procedures represent an opportunity to minimize food waste?                                    |
|             | Training and qualification            | Providing training for employees of a Food service is considered as an opportunity to reduce waste... In your view, how does providing training for employees of the Food service can be considered as an opportunity to reduce waste?                                                                                                                                                                                             | Is the provision of training for employees considered an opportunity to reduce food waste?                                                                                 |
|             | Computer equipment and software       | Investment in computer equipment and software contributes to the efficiency of meal production processes... In your opinion, how the investment in computer equipment and software in food service can be considered an opportunity to avoid waste?                                                                                                                                                                                | Does the investment in computer equipment and software contributes to the efficiency of meal production?                                                                   |

**Table S16 - Content Validity – Opportunity**

| Item        |                                       | Assertive                                                                                                                                                                                                                                                                                                                                                                                                                         | Sentence wording suggestion                                                                                                                                                | Indicator importance level |   |               |   |   |
|-------------|---------------------------------------|-----------------------------------------------------------------------------------------------------------------------------------------------------------------------------------------------------------------------------------------------------------------------------------------------------------------------------------------------------------------------------------------------------------------------------------|----------------------------------------------------------------------------------------------------------------------------------------------------------------------------|----------------------------|---|---------------|---|---|
| Opportunity | Infrastructure                        | Having adequate infrastructure (machinery, heating equipment, utensils, lay-out, among others) represents an opportunity to reduce waste... How the presence of adequate in-frastructure in a Food and Nutrition Unit-FNU (restaurant, industrial kitchen and cafete-ria) represents an opportunity for decreasing food waste?                                                                                                    | Does having adequate infrastructure represent an opportunity to reduce waste in a Food and Nutrition Unit-UAN?                                                             | Dispensable                |   | Indispensable |   |   |
|             |                                       |                                                                                                                                                                                                                                                                                                                                                                                                                                   |                                                                                                                                                                            | 1                          | 2 | 3             | 4 | 5 |
|             |                                       |                                                                                                                                                                                                                                                                                                                                                                                                                                   |                                                                                                                                                                            |                            |   |               |   | X |
|             | Utensils and technological innovation | Refrigeration equipment, machinery and utensils with efficient * technology (or technological innovation) for the production of meals is considered as an opportunity to reduce waste of food during its preparation and storage... In your opinion, how does the use of the technologies mentioned allow employees of an FNU (restaurant, industrial kitchen and cafeteria) to reduce food waste during preparation and storage? | Are efficient technology and technological innovation for the production of meals considered as an opportunity to reduce waste of food during its preparation and storage? | Dispensable                |   | Indispensable |   |   |
|             |                                       |                                                                                                                                                                                                                                                                                                                                                                                                                                   |                                                                                                                                                                            | 1                          | 2 | 3             | 4 | 5 |
|             |                                       |                                                                                                                                                                                                                                                                                                                                                                                                                                   |                                                                                                                                                                            |                            |   |               | X |   |
|             | Standardization of processes          | The standardization of processes, preparation of routines and technical procedures represent an opportunity to minimize waste... In your opinion, how the standardization of processes, preparation of routines and appropriate technical procedures in an FNUs can be considered an opportunity to avoid waste?                                                                                                                  | Do the standardization of processes, preparation of routines, and technical procedures represent an opportunity to minimize food waste?                                    | Dispensable                |   | Indispensable |   |   |
|             |                                       |                                                                                                                                                                                                                                                                                                                                                                                                                                   |                                                                                                                                                                            | 1                          | 2 | 3             | 4 | 5 |
|             |                                       |                                                                                                                                                                                                                                                                                                                                                                                                                                   |                                                                                                                                                                            |                            |   |               |   | X |
|             | Training and qualification            | Providing training for employees of a Food service is considered as an opportunity to reduce waste... In your view, how does providing training for employees of the Food service can be considered as an opportunity to reduce waste?                                                                                                                                                                                            | Is the provision of training for employees considered an opportunity to reduce food waste?                                                                                 | Dispensable                |   | Indispensable |   |   |
|             |                                       |                                                                                                                                                                                                                                                                                                                                                                                                                                   |                                                                                                                                                                            | 1                          | 2 | 3             | 4 | 5 |
|             |                                       |                                                                                                                                                                                                                                                                                                                                                                                                                                   |                                                                                                                                                                            |                            |   |               |   | X |
|             | Computer equipment and software       | Investment in computer equipment and software contributes to the efficiency of meal production processes... In your opinion, how the investment in computer equipment and software in food service can be considered an opportunity to avoid waste?                                                                                                                                                                               | Does the investment in computer equipment and software contributes to the efficiency of meal production?                                                                   | Dispensable                |   | Indispensable |   |   |
|             |                                       |                                                                                                                                                                                                                                                                                                                                                                                                                                   |                                                                                                                                                                            | 1                          | 2 | 3             | 4 | 5 |
|             |                                       |                                                                                                                                                                                                                                                                                                                                                                                                                                   |                                                                                                                                                                            | X                          |   |               |   |   |

**Table S17 - Content Validity – Opportunity**

|             |                                                                                                       |   |   |   |   |
|-------------|-------------------------------------------------------------------------------------------------------|---|---|---|---|
| Opportunity | 1. Is the latent variable relevant to the analysis of Opportunity in the practice of food waste?      |   |   |   |   |
|             | 1                                                                                                     | 2 | 3 | 4 | 5 |
|             | Totally disagree                                                                                      |   |   |   | X |
| Opportunity | 2. Are the defined indicators consistent and sufficient to jointly measure the Opportunity construct? |   |   |   |   |
|             | 1                                                                                                     | 2 | 3 | 4 | 5 |
|             | Totally disagree                                                                                      |   |   |   |   |

|                                                  |                                                                                                                        |   |   |   |                      |
|--------------------------------------------------|------------------------------------------------------------------------------------------------------------------------|---|---|---|----------------------|
|                                                  | 3. The wording of the statements is precise, and makes clear the relevance of the indicators to their latent variable? |   |   |   |                      |
|                                                  | 1<br>Totally disagree                                                                                                  | 2 | 3 | 4 | 5<br>I totally agree |
| The space below is reserved for expert comments. |                                                                                                                        |   |   |   |                      |

**Table S18** – Comparison of the assertions of the Waste Control and Management (CGD) variable

| Construct                          | Item                                | Content of submitted assertions for content validity and pre-testing                                                                                                                                                                                                             | Definition of assertions after validity of content and pre-test                                                                                           |
|------------------------------------|-------------------------------------|----------------------------------------------------------------------------------------------------------------------------------------------------------------------------------------------------------------------------------------------------------------------------------|-----------------------------------------------------------------------------------------------------------------------------------------------------------|
| Waste Control and Management (CGD) | Refrigeration and heating equipment | Equipment and utensils suitable for handling and preparation of meals improve the control of food waste... How well does the use of suitable equipment and utensils (dishes instead of trays) contribute to improving the control of food waste?                                 | Do the use equipment and utensils suitable for handling and preparation of meals improve the control of food waste?                                       |
|                                    | Methods and procedures              | Appropriate management methods and techniques for demand forecasting, inventory management, production planning, among others improve the control of food waste... How does the use of appropriate management methods and techniques contribute to improving food waste control? | Do appropriate management methods and techniques for demand forecasting, inventory management, and production planning improve the control of food waste? |
|                                    | People management                   | The recruitment of trained and qualified people to perform their work activities improves food waste control... How much does the recruitment of trained and qualified people contribute to improving food waste control?                                                        | Does the recruitment of trained and qualified people to perform their work activities improve food waste control?                                         |

**Table S19 - Content Validity – Waste Control and Management**

| Item                         |                                       | Assertive                                                                                                                                                                                                                                                                                                                                                                                                                         | Sentence wording suggestion                                                                                                                                                | Indicator importance level |                          |                          |                          |                                     |
|------------------------------|---------------------------------------|-----------------------------------------------------------------------------------------------------------------------------------------------------------------------------------------------------------------------------------------------------------------------------------------------------------------------------------------------------------------------------------------------------------------------------------|----------------------------------------------------------------------------------------------------------------------------------------------------------------------------|----------------------------|--------------------------|--------------------------|--------------------------|-------------------------------------|
| Waste Control and Management | Infrastructure                        | Having adequate infrastructure (machinery, heating equipment, utensils, lay-out, among others) represents an opportunity to reduce waste... How the presence of adequate in-frastructure in a Food and Nutrition Unit-FNU (restaurant, industrial kitchen and cafete-ria) represents an opportunity for decreasing food waste?                                                                                                    | Does having adequate infrastructure represent an opportunity to reduce waste in a Food and Nutrition Unit-UAN?                                                             | Dispensable                | Indispensable            |                          |                          |                                     |
|                              |                                       |                                                                                                                                                                                                                                                                                                                                                                                                                                   |                                                                                                                                                                            | 1                          | 2                        | 3                        | 4                        | 5                                   |
|                              |                                       |                                                                                                                                                                                                                                                                                                                                                                                                                                   |                                                                                                                                                                            | <input type="checkbox"/>   | <input type="checkbox"/> | <input type="checkbox"/> | <input type="checkbox"/> | <input checked="" type="checkbox"/> |
| Waste Control and Management | Utensils and technological innovation | Refrigeration equipment, machinery and utensils with efficient * technology (or technological innovation) for the production of meals is considered as an opportunity to reduce waste of food during its preparation and storage... In your opinion, how does the use of the technologies mentioned allow employees of an FNU (restaurant, industrial kitchen and cafeteria) to reduce food waste during preparation and storage? | Are efficient technology and technological innovation for the production of meals considered as an opportunity to reduce waste of food during its preparation and storage? | Dispensable                | Indispensable            |                          |                          |                                     |
|                              |                                       |                                                                                                                                                                                                                                                                                                                                                                                                                                   |                                                                                                                                                                            | 1                          | 2                        | 3                        | 4                        | 5                                   |
|                              |                                       |                                                                                                                                                                                                                                                                                                                                                                                                                                   |                                                                                                                                                                            | <input type="checkbox"/>   | <input type="checkbox"/> | <input type="checkbox"/> | <input type="checkbox"/> | <input checked="" type="checkbox"/> |
| Waste Control and Management | Standardization of processes          | The standardization of processes, preparation of routines and technical procedures represent an opportunity to minimize waste... In your opinion, how the standardization of processes, preparation of routines and appropriate technical procedures in an FNUs can be considered an opportunity to avoid waste?                                                                                                                  | Do the standardization of processes, preparation of routines, and technical procedures represent an opportunity to minimize food waste?                                    | Dispensable                | Indispensable            |                          |                          |                                     |
|                              |                                       |                                                                                                                                                                                                                                                                                                                                                                                                                                   |                                                                                                                                                                            | 1                          | 2                        | 3                        | 4                        | 5                                   |
|                              |                                       |                                                                                                                                                                                                                                                                                                                                                                                                                                   |                                                                                                                                                                            | <input type="checkbox"/>   | <input type="checkbox"/> | <input type="checkbox"/> | <input type="checkbox"/> | <input checked="" type="checkbox"/> |

**Table S20 - Content Validity – Waste Control and Management**

|                              |                                                                                                                        |                          |                          |                          |                          |                                     |                 |
|------------------------------|------------------------------------------------------------------------------------------------------------------------|--------------------------|--------------------------|--------------------------|--------------------------|-------------------------------------|-----------------|
| Waste Control and Management | 1. Is the latent variable relevant to the analysis of Waste Control and Management in the practice of food waste?      | 1                        | 2                        | 3                        | 4                        | 5                                   |                 |
|                              | Totally disagree                                                                                                       | <input type="checkbox"/> | <input type="checkbox"/> | <input type="checkbox"/> | <input type="checkbox"/> | <input checked="" type="checkbox"/> | I totally agree |
|                              |                                                                                                                        |                          |                          |                          |                          |                                     |                 |
| Waste Control and Management | 2. Are the defined indicators consistent and sufficient to jointly measure the Waste Control and Management construct? | 1                        | 2                        | 3                        | 4                        | 5                                   |                 |
|                              | Totally disagree                                                                                                       | <input type="checkbox"/> | <input type="checkbox"/> | <input type="checkbox"/> | <input type="checkbox"/> | <input checked="" type="checkbox"/> | I totally agree |
|                              |                                                                                                                        |                          |                          |                          |                          |                                     |                 |
| Waste Control and Management | 3. The wording of the statements is precise, and makes clear the relevance of the indicators to their latent variable? | 1                        | 2                        | 3                        | 4                        | 5                                   |                 |
|                              | Totally disagree                                                                                                       | <input type="checkbox"/> | <input type="checkbox"/> | <input type="checkbox"/> | <input type="checkbox"/> | <input checked="" type="checkbox"/> | I totally agree |
|                              |                                                                                                                        |                          |                          |                          |                          |                                     |                 |

|  |                                                  |
|--|--------------------------------------------------|
|  | The space below is reserved for expert comments. |
|--|--------------------------------------------------|

**Table S21 – Comparison of the assertions of the Food waste variable**

| Construct  | Item                     | Content of submitted assertions for content validity and pre-testing                                                                                                               | Definition of assertions after validity of content and pre-test                                                  |
|------------|--------------------------|------------------------------------------------------------------------------------------------------------------------------------------------------------------------------------|------------------------------------------------------------------------------------------------------------------|
| Food waste | Extensive land           | Food waste leads to extensive use of the soil, which can cause, for example, desertification due to soil impoverishment! How harmful to the environment can extensive land use be? | Are the soil impoverishment and its desertification aggravated by extensive land use and Food waste?             |
|            | Food security            | Food waste negatively impacts food supply and may compromise the food security of future generations! How compromising to future generations can waste be?                         | Does Food waste negatively impact the food supply and compromise the food security of future generations?        |
|            | CH <sub>4</sub> emission | Food waste directly causes increased emission of methane greenhouse gases (CH <sub>4</sub> )! How harmful to the environment can waste be?                                         | Does Food waste directly cause increased emission of methane greenhouse gases (CH <sub>4</sub> )?                |
|            | Extensive use of water   | Food waste has a negative impact on the consumption and supply of water and can cause water shortages in many regions! How compromising to access to water can waste be?           | Does Food waste negatively impact the consumption and supply of water, implying water shortages in many regions? |
|            | Pesticides use           | Food waste causes the exacerbated use of pesticides and fertilizers. How compromising to people's health can waste be?                                                             | Does food waste imply an increase in the exacerbated use of pesticides and fertilizers?                          |

**Table S22 - Content Validity – Food waste**

| Item       |                          | Assertive                                                                                                                                                                          | Sentence wording suggestion                                                                               | Indicator importance level |   |               |   |   |
|------------|--------------------------|------------------------------------------------------------------------------------------------------------------------------------------------------------------------------------|-----------------------------------------------------------------------------------------------------------|----------------------------|---|---------------|---|---|
| Food waste | Extensive land           | Food waste leads to extensive use of the soil, which can cause, for example, desertification due to soil impoverishment! How harmful to the environment can extensive land use be? | Are the soil impoverishment and its desertification aggravated by extensive land use and Food waste?      | Dispensable                |   | Indispensable |   |   |
|            |                          |                                                                                                                                                                                    |                                                                                                           | 1                          | 2 | 3             | 4 | 5 |
|            |                          |                                                                                                                                                                                    |                                                                                                           |                            |   |               |   | X |
| Food waste | Food security            | Food waste negatively impacts food supply and may compromise the food security of future generations! How compromising to future generations can waste be?                         | Does Food waste negatively impact the food supply and compromise the food security of future generations? | Dispensable                |   | Indispensable |   |   |
|            |                          |                                                                                                                                                                                    |                                                                                                           | 1                          | 2 | 3             | 4 | 5 |
|            |                          |                                                                                                                                                                                    |                                                                                                           |                            |   |               | X |   |
| Food waste | CH <sub>4</sub> emission | Food waste directly causes increased emission of methane greenhouse gases (CH <sub>4</sub> )! How harmful to the environment can waste be?                                         | Does Food waste directly cause increased emission of methane greenhouse gases (CH <sub>4</sub> )?         | Dispensable                |   | Indispensable |   |   |
|            |                          |                                                                                                                                                                                    |                                                                                                           | 1                          | 2 | 3             | 4 | 5 |
|            |                          |                                                                                                                                                                                    |                                                                                                           |                            |   |               |   |   |

|  |                        |                                                                                                                                                                          |                                                                                                                  |             |   |               |          |   |
|--|------------------------|--------------------------------------------------------------------------------------------------------------------------------------------------------------------------|------------------------------------------------------------------------------------------------------------------|-------------|---|---------------|----------|---|
|  |                        |                                                                                                                                                                          |                                                                                                                  | 1           | 2 | 3             | 4        | 5 |
|  |                        |                                                                                                                                                                          |                                                                                                                  |             |   |               | <b>X</b> |   |
|  | Extensive use of water | Food waste has a negative impact on the consumption and supply of water and can cause water shortages in many regions! How compromising to access to water can waste be? | Does Food waste negatively impact the consumption and supply of water, implying water shortages in many regions? | Dispensable |   | Indispensable |          |   |
|  |                        |                                                                                                                                                                          |                                                                                                                  | 1           | 2 | 3             | 4        | 5 |
|  |                        |                                                                                                                                                                          |                                                                                                                  |             |   |               |          |   |
|  | Pesticides use         | Food waste causes the exacerbated use of pesticides and fertilizers. How compromising to people's health can waste be?                                                   | Does food waste imply an increase in the exacerbated use of pesticides and fertilizers?                          | Dispensable |   | Indispensable |          |   |
|  |                        |                                                                                                                                                                          |                                                                                                                  | 1           | 2 | 3             | 4        | 5 |
|  |                        |                                                                                                                                                                          |                                                                                                                  |             |   |               |          |   |

**Table S23 - Content Validity – Food waste**

|                                                  |                                                                                                                                                                                                                                    |
|--------------------------------------------------|------------------------------------------------------------------------------------------------------------------------------------------------------------------------------------------------------------------------------------|
| Food waste                                       | 1. Is the latent variable relevant to the analysis of Food waste in the practice of Food waste?                                                                                                                                    |
|                                                  | <div> <div>Totally disagree</div> <div> <div>1</div> <div>2</div> <div>3</div> <div>4</div> <div>5</div> </div> <div> <div></div> <div></div> <div></div> <div></div> <div><b>X</b></div> </div> <div>I totally agree</div> </div> |
|                                                  | 2. Are the defined indicators consistent and sufficient to jointly measure the Food waste construct?                                                                                                                               |
|                                                  | <div> <div>Totally disagree</div> <div> <div>1</div> <div>2</div> <div>3</div> <div>4</div> <div>5</div> </div> <div> <div></div> <div></div> <div></div> <div></div> <div><b>X</b></div> </div> <div>I totally agree</div> </div> |
|                                                  | 3. The wording of the statements is precise, and makes clear the relevance of the indicators to their latent variable?                                                                                                             |
|                                                  | <div> <div>Totally disagree</div> <div> <div>1</div> <div>2</div> <div>3</div> <div>4</div> <div>5</div> </div> <div> <div></div> <div></div> <div></div> <div></div> <div><b>X</b></div> </div> <div>I totally agree</div> </div> |
| The space below is reserved for expert comments. |                                                                                                                                                                                                                                    |
