# Supplementary material for: Evaluation of Waste in Food Services: A Structural Equation Analysis Using Behavioral and Operational Factors
Source: MDPI journal article supplement (doi:10.3390/su15108044), 2023-05-15
Supplement: s1 [file s1 › File S5.pdf]

# File S5: Discriminant and convergent validity.

**Table S1.** Cross-loading criteria.

|      | HB           | CD           | CGD          | DS           | IN           | MO           | OP           |
|------|--------------|--------------|--------------|--------------|--------------|--------------|--------------|
| HB1  | <b>0.742</b> | 0.048        | 0.339        | 0.259        | 0.071        | 0.115        | 0.194        |
| HB2  | <b>0.838</b> | 0.237        | 0.341        | 0.189        | 0.222        | 0.021        | 0.436        |
| OP4  | <b>0.842</b> | 0.354        | 0.486        | 0.383        | 0.380        | 0.379        | 0.570        |
| CD1  | 0.208        | <b>0.796</b> | 0.376        | 0.216        | 0.265        | 0.156        | 0.397        |
| CD2  | 0.230        | <b>0.834</b> | 0.341        | 0.159        | 0.366        | 0.270        | 0.325        |
| CD3  | 0.247        | <b>0.782</b> | 0.497        | 0.178        | 0.216        | 0.152        | 0.344        |
| CGD1 | 0.263        | 0.412        | <b>0.636</b> | 0.202        | 0.262        | 0.044        | 0.293        |
| CGD2 | 0.291        | 0.341        | <b>0.698</b> | 0.142        | 0.105        | 0.210        | 0.471        |
| CGD3 | 0.464        | 0.339        | <b>0.781</b> | 0.437        | 0.215        | 0.265        | 0.445        |
| DS1  | 0.396        | 0.329        | 0.415        | <b>0.892</b> | 0.330        | 0.402        | 0.327        |
| DS2  | 0.248        | 0.167        | 0.287        | <b>0.837</b> | 0.357        | 0.230        | 0.105        |
| DS3  | 0.192        | 0.020        | 0.175        | <b>0.611</b> | 0.036        | 0.313        | 0.000        |
| DS4  | 0.210        | 0.142        | 0.279        | <b>0.794</b> | 0.260        | 0.212        | 0.229        |
| DS5  | 0.278        | 0.070        | 0.275        | <b>0.735</b> | 0.245        | 0.288        | 0.159        |
| IN1  | 0.226        | 0.099        | 0.012        | 0.143        | <b>0.620</b> | 0.184        | 0.118        |
| IN2  | 0.043        | 0.060        | -0.129       | 0.088        | <b>0.666</b> | 0.139        | 0.073        |
| IN3  | 0.118        | 0.200        | 0.031        | 0.281        | <b>0.760</b> | 0.226        | 0.231        |
| IN5  | 0.334        | 0.386        | 0.471        | 0.289        | <b>0.653</b> | 0.198        | 0.420        |
| MO2  | 0.162        | 0.142        | 0.168        | 0.349        | 0.155        | <b>0.765</b> | 0.152        |
| MO3  | 0.101        | 0.100        | 0.146        | 0.330        | 0.178        | <b>0.713</b> | 0.127        |
| MO4  | 0.234        | 0.257        | 0.249        | 0.307        | 0.260        | <b>0.939</b> | 0.200        |
| MO5  | 0.266        | 0.249        | 0.267        | 0.314        | 0.320        | <b>0.911</b> | 0.208        |
| OP1  | 0.352        | 0.348        | 0.470        | 0.169        | 0.324        | 0.164        | <b>0.841</b> |
| OP2  | 0.397        | 0.464        | 0.458        | 0.241        | 0.327        | 0.160        | <b>0.803</b> |
| OP3  | 0.482        | 0.212        | 0.419        | 0.173        | 0.267        | 0.173        | <b>0.700</b> |

**Table S2.** Fornell and Lacker Criterion.

|     | HB           | DS           | IN           | MO           | OP           | CD           | CGD          |
|-----|--------------|--------------|--------------|--------------|--------------|--------------|--------------|
| HB  | <b>0.809</b> |              |              |              |              |              |              |
| DS  | 0.358        | <b>0.780</b> |              |              |              |              |              |
| IN  | 0.301        | 0.345        | <b>0.677</b> |              |              |              |              |
| MO  | 0.243        | 0.373        | 0.288        | <b>0.837</b> |              |              |              |
| OP  | 0.520        | 0.248        | 0.392        | 0.211        | <b>0.784</b> |              |              |
| CD  | 0.284        | 0.228        | 0.351        | 0.241        | 0.440        | <b>0.804</b> |              |
| CGD | 0.494        | 0.389        | 0.272        | 0.259        | 0.574        | 0.505        | <b>0.708</b> |
